# Supplementary material
Source: MDPI journal article supplement (https://www.mdpi.com/2313-0105/9/6/327)
Supplement: s1 [file s1]

# Multifunctional MXene-Fe<sub>3</sub>O<sub>4</sub>-carbon nanotube composite electrodes for high active mass asymmetric supercapacitors

Wenyu Liang <sup>1</sup>, Rui Xu<sup>1,\*</sup>, Mohamed Nawwar <sup>2</sup> and Igor Zhitomirsky <sup>3,\*</sup>

<sup>1</sup> School of Materials Science and Engineering, University of Science and Technology Beijing, Beijing, 100083 China;

<sup>2</sup> Technical Research Center (TRC), Cairo, Egypt;

<sup>3</sup> Department of Materials Science and Engineering, McMaster University, Hamilton, ON, L8S 1L7 Canada;

\*Correspondence: RX: ruixu@ustb.edu.cn; IZ: zhitom@mcmaster.ca

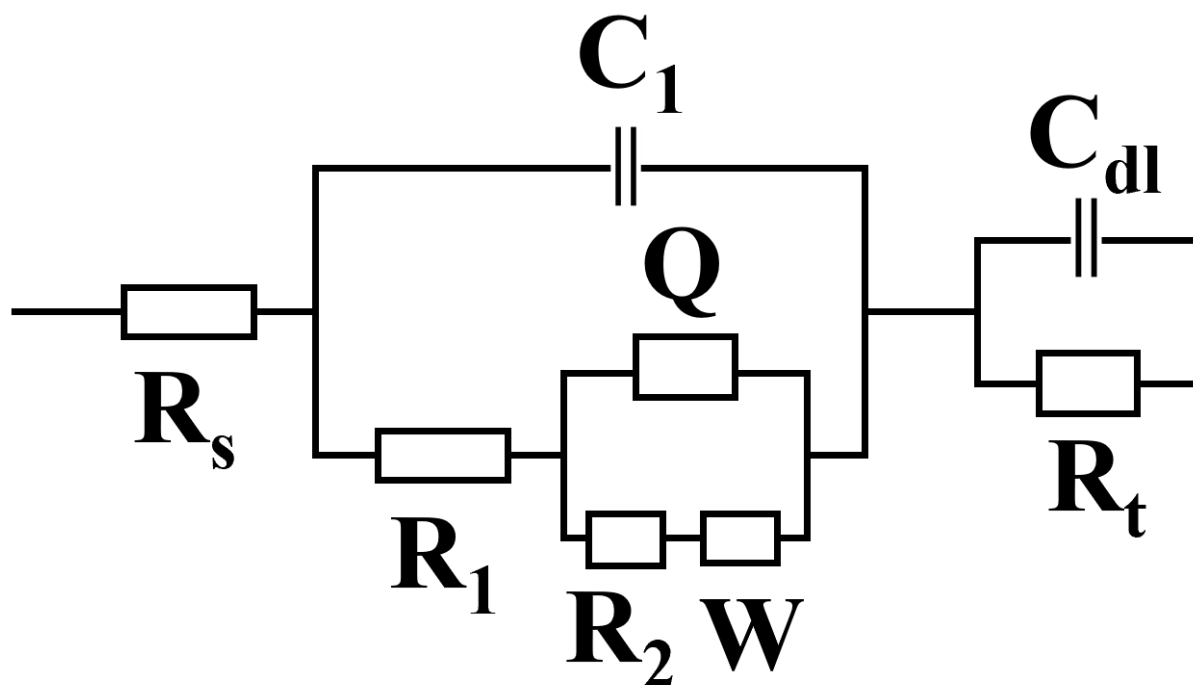

Figure S1. Equivalent circuit developed from high active mass loading electrodes. R-C(Q) transmission line was combined in series with solution resistance  $R_s$ .  $R_n$  elements represented electrolyte resistance.  $Q$  was related to the constant phase elements and  $W$  stood for Warburg impedance. Double layer capacitance  $C_{dl}$  was in parallel with the charge transfer resistance  $R_t$ .

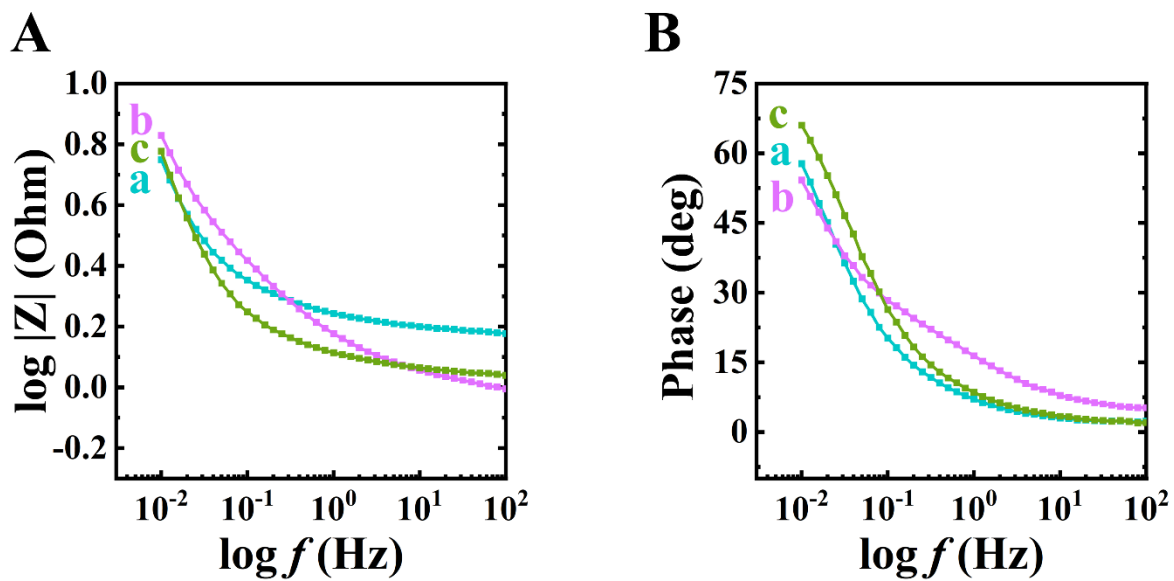

Figure S2. Bold modulus of (A)impedance and (B)phase angle plot for (a)60Ti<sub>3</sub>C<sub>2</sub>T<sub>x</sub>-30Fe<sub>3</sub>O<sub>4</sub>-10MCNT, (b)55Ti<sub>3</sub>C<sub>2</sub>T<sub>x</sub>-30Fe<sub>3</sub>O<sub>4</sub>-15MCNT and (c)55Ti<sub>3</sub>C<sub>2</sub>T<sub>x</sub>-25Fe<sub>3</sub>O<sub>4</sub>-20MCNT electrodes prepared by method 2 with AML of 35 mg cm<sup>-2</sup>.

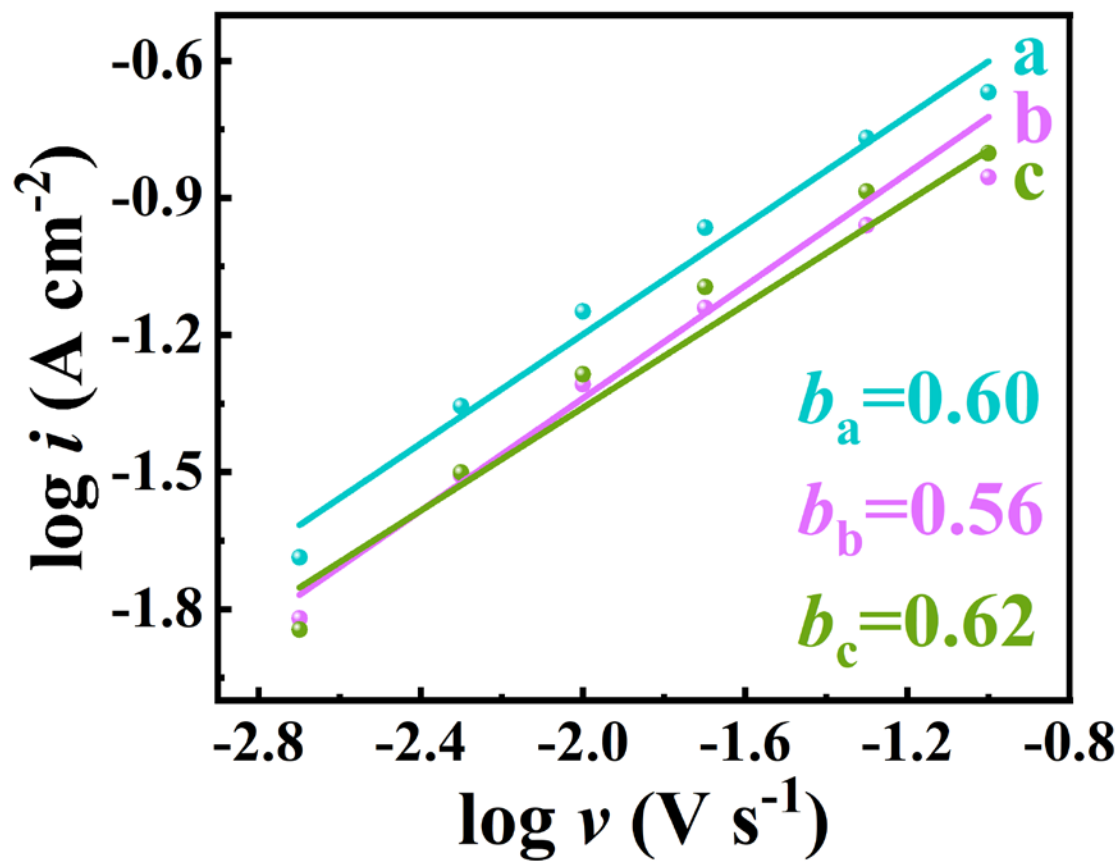

Figure S3. Current ( $i$ ) versus scan rate ( $v$ ) dependence in a logarithmic scale used for the calculation of  $b$  value by equation  $i=av^b$  for (a)  $60\text{Ti}_3\text{C}_2\text{T}_x\text{-}30\text{Fe}_3\text{O}_4\text{-}10\text{MCNT}$ , (b)  $55\text{Ti}_3\text{C}_2\text{T}_x\text{-}30\text{Fe}_3\text{O}_4\text{-}15\text{MCNT}$  and (c)  $55\text{Ti}_3\text{C}_2\text{T}_x\text{-}25\text{Fe}_3\text{O}_4\text{-}20\text{MCNT}$  electrodes prepared by method 2 with AML of  $35 \text{ mg cm}^{-2}$ .

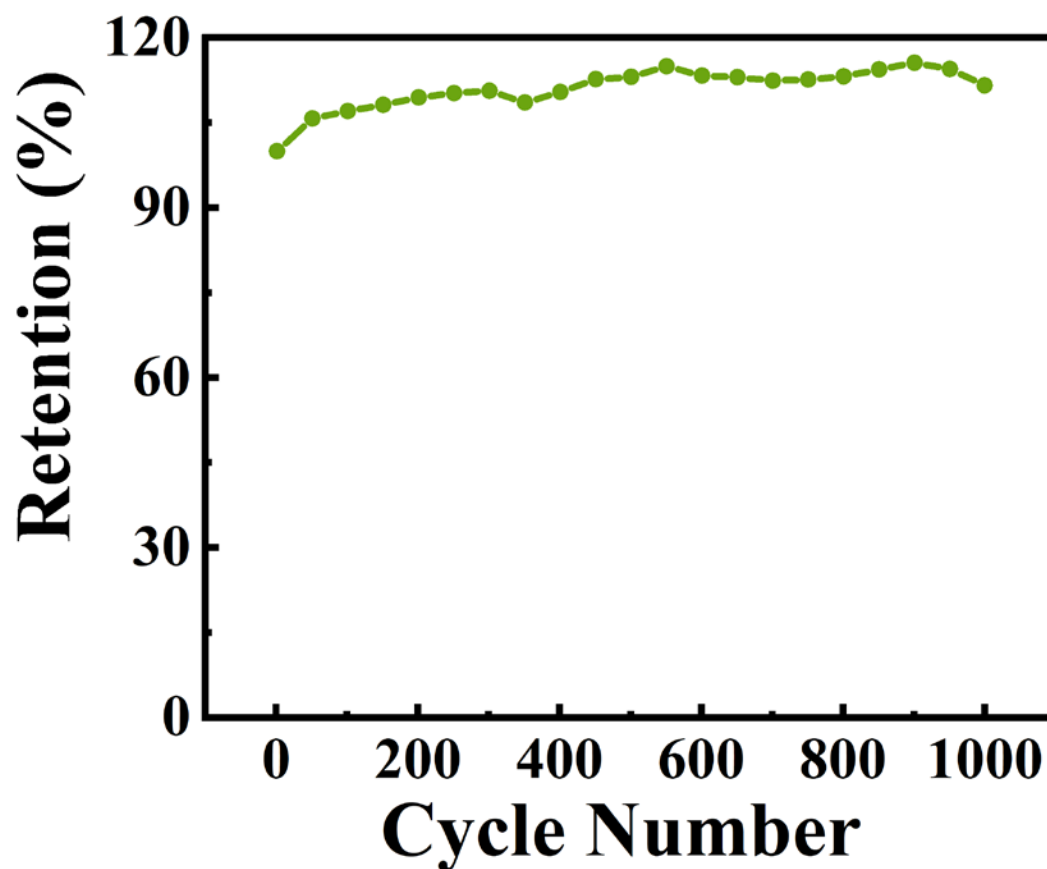

Figure S4. Cycling stability of 60Ti<sub>3</sub>C<sub>2</sub>T<sub>x</sub>-30Fe<sub>3</sub>O<sub>4</sub>-10MCNT electrode at 40 mg cm<sup>-2</sup> from CV at scan rate of 50 mV s<sup>-1</sup>.

Table S1. Capacitance(F cm<sup>-2</sup>) and capacity(mAh g<sup>-1</sup>) for as-prepared electrodes, calculated from CV data at 2 mV s<sup>-1</sup> scan rate.

| Preparation Method | Electrode                                                                                 | Mass loading (mg cm <sup>-2</sup> ) | Capacitance (F cm <sup>-2</sup> ) | Capacity (mAh g <sup>-1</sup> ) |
|--------------------|-------------------------------------------------------------------------------------------|-------------------------------------|-----------------------------------|---------------------------------|
| 1                  | 60Ti <sub>3</sub> C <sub>2</sub> T <sub>x</sub> -30Fe <sub>3</sub> O <sub>4</sub> -10MCNT | 35                                  | 2.42                              | 17.29                           |
| 2                  | 60Ti <sub>3</sub> C <sub>2</sub> T <sub>x</sub> -30Fe <sub>3</sub> O <sub>4</sub> -10MCNT | 35                                  | 5.44                              | 38.86                           |
| 2                  | 55Ti <sub>3</sub> C <sub>2</sub> T <sub>x</sub> -30Fe <sub>3</sub> O <sub>4</sub> -15MCNT | 35                                  | 4.92                              | 35.14                           |
| 2                  | 55Ti <sub>3</sub> C <sub>2</sub> T <sub>x</sub> -25Fe <sub>3</sub> O <sub>4</sub> -20MCNT | 35                                  | 4.62                              | 29.85                           |
| 2                  | 60Ti <sub>3</sub> C <sub>2</sub> T <sub>x</sub> -30Fe <sub>3</sub> O <sub>4</sub> -10MCNT | 30                                  | 4.18                              | 34.83                           |
| 2                  | 60Ti <sub>3</sub> C <sub>2</sub> T <sub>x</sub> -30Fe <sub>3</sub> O <sub>4</sub> -10MCNT | 40                                  | 6.59                              | 41.19                           |

|   |                                                                                           |    |      |       |
|---|-------------------------------------------------------------------------------------------|----|------|-------|
| 2 | 60Ti <sub>3</sub> C <sub>2</sub> T <sub>x</sub> -30Fe <sub>3</sub> O <sub>4</sub> -10MCNT | 45 | 5.89 | 32.72 |
|---|-------------------------------------------------------------------------------------------|----|------|-------|

Table S2. Summary of electrochemical performance of Ti<sub>3</sub>C<sub>2</sub>T<sub>x</sub>/Fe<sub>3</sub>O<sub>4</sub>-based composite anode for supercapacitors.

| <b>Material</b>                                                                           | <b>Active mass<br/>(mg cm<sup>-2</sup>)</b> | <b>Areal capacitance<br/>(F cm<sup>-2</sup>)</b> | <b>Electrolyte</b>                   | <b>Potential window</b> | <b>Reference</b> |
|-------------------------------------------------------------------------------------------|---------------------------------------------|--------------------------------------------------|--------------------------------------|-------------------------|------------------|
| Ti <sub>3</sub> C <sub>2</sub> T <sub>x</sub> -Fe <sub>3</sub> O <sub>4</sub>             | 1                                           | 0.37                                             | 1M KOH                               | -1.1~-0.3 V vs. Ag/AgCl | [61]             |
| Ti <sub>3</sub> C <sub>2</sub> T <sub>x</sub> -Fe <sub>3</sub> O <sub>4</sub> -rGO        | 5                                           | 1.25                                             | 1M KOH                               | -1.1~-0.3 V vs. Ag/AgCl | [62]             |
| 50Ti <sub>3</sub> C <sub>2</sub> T <sub>x</sub> -30Fe <sub>3</sub> O <sub>4</sub> -20MCNT | 35                                          | 5.52                                             | 0.5M Na <sub>2</sub> SO <sub>4</sub> | -1.1~-0.3 V vs. SCE     | [49]             |
| 60Ti <sub>3</sub> C <sub>2</sub> T <sub>x</sub> -30Fe <sub>3</sub> O <sub>4</sub> -10MCNT | 40                                          | 6.59                                             | 0.5M Na <sub>2</sub> SO <sub>4</sub> | -1.1~-0.3 V vs. SCE     | This work        |
